# Supplementary material for: Identification MNS1, FRZB, OGN, LUM, SERP1NA3 and FCN3 as the potential immune-related key genes involved in ischaemic cardiomyopathy by random forest and nomogram
Source: Aging (Albany NY). 2023 Feb 27;15(5):1475–95. doi: 10.18632/aging.204547 (PMC10042686; doi:10.18632/aging.204547)
Supplement: Supplementary Table 1 [file aging-15-204547-s002.xls]

## Sheet: Additional Table S1
Supplementary Table 1. A total of 39 differentially expressed genes were identified.
id	logFC	AveExpr	t	P.Value	adj.P.Val	B
SERPINA3	-2.58824	7.34694	-22.1857	7.6623e-61	1.44503e-56	127.509
FCN3	-1.88224	8.17008	-20.0184	1.01718e-53	9.59148e-50	111.365
MNS1	1.03355	4.56744	17.8441	2.1838e-46	8.23686e-43	94.7196
SMOC2	1.08157	6.85416	16.973	2.06094e-43	6.47789e-40	87.9597
FRZB	1.28114	5.77945	15.6247	8.70991e-39	1.49328e-35	77.4429
SFRP4	1.69151	4.69554	14.9726	1.50978e-36	1.58183e-33	72.3513
SLCO4A1	-1.22299	6.68611	-14.7942	6.17976e-36	6.1339e-33	70.9593
CD163	-1.45038	7.49942	-14.7827	6.76692e-36	6.38087e-33	70.8696
LUM	1.18692	9.49465	14.6032	2.79242e-35	2.19426e-32	69.4696
OGN	1.36494	7.50072	14.462	8.50317e-35	6.16774e-32	68.3696
VSIG4	-1.2892	7.21758	-14.2007	6.66417e-34	3.1721e-31	66.3359
ASPN	1.69706	7.29433	14.0501	2.17933e-33	9.78571e-31	65.1655
RNASE2	-1.14359	4.34045	-13.4538	2.34453e-31	8.34254e-29	60.5443
IL1RL1	-1.68891	5.92365	-13.3489	5.32507e-31	1.73147e-28	59.734
MYH6	-1.4561	10.3371	-12.5582	2.48579e-28	5.5809e-26	53.6638
LYVE1	-1.35427	9.17425	-12.5031	3.80232e-28	7.88e-26	53.2441
PLA2G2A	-1.81853	8.18611	-12.3914	8.99875e-28	1.76779e-25	52.3933
PHLDA1	1.03005	6.49622	12.272	2.25604e-27	4.13075e-25	51.4857
ADAMTS9	-1.10901	8.2546	-12.0403	1.33444e-26	2.06281e-24	49.7306
IFI44L	1.02643	7.0171	11.8804	4.52747e-26	6.32471e-24	48.5244
FCER1G	-1.00729	6.81939	-11.7665	1.07773e-25	1.43133e-23	47.6682
MYOT	-1.09649	7.20745	-11.6049	3.67487e-25	4.39876e-23	46.4572
MXRA5	1.17625	7.229	11.0807	1.90015e-23	1.62886e-21	42.5631
ANKRD2	-1.01579	9.37939	-9.88296	1.22909e-19	5.55859e-18	33.9101
ADAMTS4	-1.02071	6.18003	-9.75642	3.03501e-19	1.28047e-17	33.0194
MGST1	-1.10274	7.16164	-9.56625	1.16961e-18	4.47419e-17	31.6905
DSC1	1.05716	6.50075	9.13143	2.44406e-17	7.4223e-16	28.6979
AOX1	-1.02379	5.43836	-9.02582	5.0627e-17	1.43791e-15	27.9813
C6	1.055	8.39677	8.35147	4.78777e-15	9.67766e-14	23.5085
CYP4B1	-1.05232	7.1345	-8.16929	1.58493e-14	2.91612e-13	22.3329
MIR208A	-1.07899	4.90051	-7.84508	1.28649e-13	2.02352e-12	20.278
HBB	1.57695	7.51594	7.80495	1.66154e-13	2.56005e-12	20.0271
SERPINE1	-1.32685	7.14537	-7.28972	4.14058e-12	5.0805e-11	16.8766
NPPA	1.53234	7.17964	6.52462	3.80154e-10	3.46932e-09	12.4613
HMGCS2	-1.16555	6.44624	-5.94667	9.24262e-09	6.78764e-08	9.35648
USP9Y	1.19794	6.44451	5.43031	1.33937e-07	8.09072e-07	6.76653
EIF1AY	1.61231	8.20724	4.76417	3.22909e-06	1.53317e-05	3.703
DDX3Y	1.07425	6.28487	4.60368	6.63099e-06	2.98529e-05	3.01434
UTY	1.03991	6.19586	4.58452	7.21674e-06	3.22666e-05	2.93344
