# Supplementary material for: Identification MNS1, FRZB, OGN, LUM, SERP1NA3 and FCN3 as the potential immune-related key genes involved in ischaemic cardiomyopathy by random forest and nomogram
Source: Aging (Albany NY). 2023 Feb 27;15(5):1475–95. doi: 10.18632/aging.204547 (PMC10042686; doi:10.18632/aging.204547)
Supplement: Supplementary Table 2 [file aging-15-204547-s003.xls]

## Sheet: Additional Table S2
Supplementary Table 2. The gene expression matrix in the training set (GSE42955 combined with GSE57338).
id	GSM1053922	GSM1053929	GSM1053939	GSM1053940	GSM1053942	GSM1379830	GSM1379831	GSM1379832	GSM1379833	GSM1379834	GSM1379835	GSM1379836	GSM1379837	GSM1379838	GSM1379839	GSM1379840	GSM1379841	GSM1379842	GSM1379843	GSM1379844	GSM1379845	GSM1379846	GSM1379847	GSM1379848	GSM1379849	GSM1379850	GSM1379851	GSM1379852	GSM1379853	GSM1379854	GSM1379855	GSM1379856	GSM1379857	GSM1379858	GSM1379859	GSM1379860	GSM1379861	GSM1379862	GSM1379863	GSM1379864	GSM1379865	GSM1379866	GSM1379867	GSM1379868	GSM1379869	GSM1379870	GSM1379871	GSM1379872	GSM1379873
SERPINA3	8.52722	7.56293	8.0168	8.04315	8.12198	7.41408	8.81885	7.99137	9.23016	7.83474	7.59498	9.29158	8.87307	8.5902	8.18421	8.81323	9.08115	5.84412	8.24889	7.92859	7.15567	8.68336	7.55491	6.84282	7.14267	8.5041	5.6449	8.22467	7.18478	8.20905	7.42372	7.56717	8.98102	9.1486	9.20415	8.8893	9.55211	9.07015	7.20442	9.31902	7.86627	9.15989	8.1835	7.83871	8.84107	9.84839	7.58937	9.63109	8.35404
FCN3	8.28213	7.78895	8.57543	8.36962	8.7518	10.2356	8.66737	10.2531	8.86726	10.6984	8.67137	9.8492	8.78448	9.20128	8.70865	10.0637	9.63608	8.60275	8.64265	9.4602	9.45001	9.95224	8.49558	8.26855	7.97111	9.72871	8.25537	8.94252	8.61427	9.34982	8.50566	9.77859	8.57345	7.94755	9.57895	10.0641	8.69869	9.33827	7.8696	9.34625	10.1528	9.14494	10.6384	9.3001	10.0497	9.02164	7.90822	9.54754	8.48366
MNS1	4.40233	4.41915	4.98904	4.75751	4.78269	4.14303	4.10449	5.18139	4.6592	3.09734	4.06814	4.2473	3.93187	4.00213	4.3678	4.36213	3.72088	4.86435	3.15111	3.7887	4.60943	3.82275	4.70864	4.26376	4.77935	4.87519	4.56946	4.22395	4.16289	4.10752	5.31164	4.0169	4.1488	3.64246	3.48901	4.20762	3.33218	3.37057	5.07721	3.78843	3.47819	3.89561	4.35229	5.10595	3.50375	4.4802	4.25526	4.29581	4.37722
SMOC2	5.84936	6.63788	7.37826	6.74965	6.98602	5.37339	6.90381	6.31382	5.89108	5.72183	6.3404	6.30901	6.23132	6.29956	6.23939	6.00627	6.70228	6.8134	6.374	6.04548	7.51046	6.10438	6.2389	6.84018	6.1199	6.38042	7.14134	5.9961	6.7979	5.80139	7.05628	6.34011	6.47761	6.06351	5.80798	5.83542	6.225	6.3238	7.77016	5.71032	6.28894	6.48801	6.00329	6.65575	5.93758	5.98616	6.95769	6.69401	5.85221
FRZB	5.15021	5.3683	6.59687	5.17151	5.91051	4.96292	5.68563	4.83155	5.21665	4.04891	6.23098	6.42432	4.38084	4.75997	5.45355	5.10465	5.71622	6.61813	5.1135	5.36976	5.77285	4.99178	5.05146	5.71399	5.61334	5.37958	5.92809	5.02491	6.05736	5.61515	5.61173	4.75072	4.87611	4.73701	4.90088	4.64655	5.01837	5.2117	7.06324	4.97793	4.89517	5.52013	5.21268	5.32912	4.52535	4.93695	5.5609	5.18751	5.18628
SFRP4	4.49571	4.67288	5.43436	4.3301	4.46705	3.71181	4.6397	4.04484	3.54593	2.61268	4.02655	4.74254	2.8005	4.37085	4.15335	3.18557	3.24075	4.65265	3.61591	3.31847	4.60492	3.25957	4.43063	5.18803	4.79264	3.79926	4.55108	3.52987	4.51714	3.29954	4.71367	3.73707	3.7045	3.63436	3.48507	3.38669	3.90089	5.47463	4.9154	2.94292	3.30656	4.11247	3.86127	3.34508	3.44651	3.45674	3.68369	3.90686	3.31605
SLCO4A1	7.09726	6.3406	6.24717	6.35668	6.59461	7.12314	7.64607	7.1449	7.33179	7.05319	7.2557	7.63996	7.27501	7.4837	7.73343	7.97499	7.28947	6.56892	7.00011	7.17406	6.8786	6.17474	6.26788	5.76337	6.14056	7.16284	5.91441	7.24568	7.02001	7.33857	6.54357	7.50483	6.65884	7.40278	7.32703	7.82432	7.22067	8.29859	6.2388	7.04413	7.87411	7.47141	6.88852	7.56088	6.88355	7.37653	6.48777	6.79636	7.33509
CD163	7.05107	7.13634	7.71158	8.32368	7.83324	7.86663	8.51336	8.07047	8.67993	8.00779	8.28487	8.59429	7.92493	8.45469	8.45292	8.26084	9.15819	7.9318	8.66814	7.8317	7.44644	8.11694	7.86243	6.51532	6.65755	8.42813	6.24108	7.98451	7.90365	8.45443	8.14258	7.99784	8.80068	9.33113	8.91141	8.10621	8.275	8.0265	7.29889	8.00567	7.66666	8.3551	8.09066	7.74504	8.22826	9.53231	6.48498	8.30016	8.11895
LUM	8.7218	9.18718	10.4735	9.56349	9.78681	7.52074	9.42712	8.55914	8.04376	7.48788	8.76751	9.19125	8.16018	9.04334	8.27994	7.95001	9.28526	9.38481	8.39085	8.42299	9.42092	9.24121	9.62684	9.56454	8.64416	8.52087	8.57524	8.81165	9.07088	8.6511	9.38185	8.7027	9.93218	8.88723	8.16645	9.00572	9.35637	8.16264	10.5225	8.93801	7.92978	8.71829	9.06538	8.1369	8.33683	8.83225	9.59581	8.77354	7.95455
OGN	6.28388	7.12172	8.15473	6.77876	7.92695	5.77639	7.14034	5.85459	6.56158	5.753	7.54211	7.56118	5.53329	6.98429	6.25737	6.51933	7.22811	7.15253	6.79666	5.47559	7.2619	7.34411	6.83072	7.40084	6.77181	6.96011	7.30531	6.69983	6.86994	6.83686	7.03542	6.10356	7.59689	6.98302	6.92617	6.45686	7.22267	4.96909	9.07009	6.47596	5.31258	6.18306	7.01261	6.66563	6.17246	6.14233	7.37702	6.8168	6.08637
VSIG4	6.5045	6.62564	7.63588	7.48708	7.27141	7.6609	7.48732	8.41632	8.73408	7.68896	7.12301	8.46074	8.34053	7.64368	8.3234	7.93363	9.48131	7.93488	9.02651	8.44952	7.97203	8.03687	7.90862	6.79656	7.2183	8.63003	6.37405	7.82549	7.79552	8.47026	7.6122	7.90384	8.97817	8.62587	8.32162	7.86	7.66839	6.75929	6.93192	8.75821	7.96854	7.67775	8.20718	7.4982	8.48622	9.3911	6.90855	8.0816	8.0081
ASPN	6.67209	6.87224	8.87807	7.57061	7.72151	5.11714	7.24988	7.68475	5.12562	6.60189	6.85868	5.858	5.55106	6.05234	7.12859	5.2972	7.16294	7.03929	6.51474	6.56629	6.44113	8.35225	9.25982	7.6564	7.32862	7.58394	7.17286	6.6341	6.9499	6.47962	7.38454	6.22702	8.23848	7.51734	4.72065	5.36959	6.32002	5.29477	8.60883	7.99047	5.68035	5.69794	7.34065	6.66339	6.37096	6.48184	6.33305	5.27154	6.2998
RNASE2	4.37095	3.95627	3.7047	4.65109	4.21898	3.82644	3.9038	6.19414	5.9035	4.62697	3.8986	5.79039	5.26262	3.48974	4.53195	5.59659	6.60451	4.06478	6.316	5.65889	4.26565	4.82534	5.14061	3.68438	4.16381	5.43696	3.36595	4.58156	4.19299	6.54636	3.94982	4.55047	5.72266	5.52377	5.85346	4.9751	4.55064	5.50864	3.76139	6.07255	4.78097	4.52115	5.3433	4.02902	5.45295	6.17026	3.8148	4.99812	5.12585
IL1RL1	5.14425	5.33022	5.20835	5.41362	5.22936	8.42281	6.74072	6.90269	7.92383	6.36949	6.82165	6.61835	7.03867	7.10119	5.92296	7.89804	6.51675	5.15729	6.92246	6.08726	6.61403	6.74156	7.56891	4.84489	4.7573	7.39271	4.60478	6.26036	5.19798	7.28087	7.19519	5.66201	6.83818	6.22727	8.84492	7.26816	5.76589	8.47463	5.89487	7.80895	7.0786	8.46301	6.13519	6.13987	7.07718	8.21566	4.76276	7.38068	6.98013
MYH6	9.55928	10.6337	11.3339	10.9549	7.93847	10.2453	10.5808	11.8467	10.9381	11.7265	10.862	11.1492	11.7471	10.7057	12.0914	12.4759	10.3956	10.5265	11.904	12.2943	10.7379	11.16	11.3699	10.2406	11.3445	10.5707	10.1265	11.3028	11.4732	11.9462	11.244	11.29	11.8785	11.5183	10.9588	11.8909	11.7492	11.0794	8.25576	11.9136	11.8115	11.2001	9.6159	10.0991	12.2073	12.0218	8.11312	11.9562	12.0113
LYVE1	8.6579	8.72485	10.7871	8.8883	10.0353	8.99176	9.84882	10.4467	10.7884	9.8143	9.42309	9.93567	9.831	9.6928	9.89377	9.95431	10.5689	9.42696	10.3384	9.74774	9.64515	9.35551	8.86551	9.49393	8.87431	10.0094	8.24911	9.70476	9.6851	10.0322	9.08318	9.7353	10.4433	9.62636	10.3499	10.2998	9.99192	8.96067	8.84545	9.95024	9.9736	9.56362	9.95233	8.73719	9.72873	10.6145	9.45632	9.7505	9.54462
PLA2G2A	8.84458	7.28306	9.37956	7.46104	9.67133	8.36342	9.33735	8.70868	10.0925	7.50943	7.60093	10.4334	9.47563	9.06585	8.3511	9.33466	10.3271	8.45034	9.68877	8.70245	7.56383	8.77876	5.4504	7.3945	9.01762	9.56157	7.88535	9.62083	7.87479	9.06292	8.41497	8.05585	8.57603	8.84046	10.0493	8.25661	8.92369	9.28203	7.7629	10.0348	8.28051	9.9216	7.2074	8.00235	9.54371	9.68654	9.65726	10.1815	9.19545
PHLDA1	6.66163	5.6168	7.86882	7.56858	6.35488	6.09591	6.45125	5.52662	5.01977	5.99283	6.20519	6.32517	6.24496	7.08494	6.13307	5.70567	5.53867	6.24392	5.12517	5.55232	6.11991	5.84143	7.23632	6.36169	6.1638	6.57571	6.06991	6.26353	5.40026	5.89763	5.91262	5.28037	5.69376	6.72908	5.8401	5.56118	5.34216	7.88309	5.92263	5.81559	5.59874	6.36441	6.25904	6.55093	5.59426	7.25455	6.79814	5.89381	5.67344
ADAMTS9	9.35968	7.98357	7.98221	7.71363	7.45693	8.05045	8.64137	8.69658	8.62298	8.01061	8.75649	9.59086	8.17131	9.10583	9.28656	9.42389	8.28225	7.13891	8.57948	7.97848	8.31121	8.44087	8.9808	7.78697	7.46782	9.12892	7.56332	8.38028	7.98984	8.61562	6.98105	8.20336	8.41687	9.03045	9.21123	8.56561	8.72196	10.7827	7.06446	9.71376	8.82393	10.5533	8.48993	8.19706	8.45538	9.89575	9.13869	9.17214	8.8074
IFI44L	7.715	7.55022	7.39293	7.5108	8.91192	6.02507	6.39244	6.461	6.34406	5.94484	6.92111	5.88738	6.79156	6.08821	7.11422	5.84066	5.96281	7.45936	7.12723	7.26052	6.00736	6.58168	6.99065	7.74402	6.82129	5.9253	7.48138	7.6245	7.98619	6.58478	7.27697	6.64786	6.72675	6.64824	5.7829	5.31248	6.23201	5.98531	7.49677	6.95389	6.31492	5.15882	7.32822	5.75208	5.96566	5.63418	6.86451	5.94792	6.8643
FCER1G	6.79031	6.59821	7.51389	7.06823	8.31231	6.37016	7.80768	7.70016	8.16722	7.25809	6.5263	8.25932	7.62176	7.4867	7.27266	7.62118	7.56377	6.30186	8.06691	7.36024	6.98236	7.23893	7.50439	7.10194	6.44618	7.39288	5.436	6.7995	7.21176	7.83548	6.78286	6.80018	7.3573	7.58242	7.98967	7.08056	7.13903	7.48071	5.9495	7.3872	7.44115	7.4901	6.91218	6.10152	7.04776	8.97534	7.88043	7.74332	7.26844
MYOT	7.2507	7.76927	7.22542	8.33678	6.63855	7.67319	8.17521	7.66065	8.63299	9.03152	8.23531	6.93335	7.71307	7.52166	8.37561	6.77477	8.30177	6.09884	8.61165	6.77776	7.65599	6.90578	8.97404	6.27834	6.91101	7.67838	6.50084	7.73186	6.3064	6.80855	7.30965	7.32673	7.64777	8.87062	8.00886	8.21229	7.70498	8.18431	7.05701	9.53099	8.29454	7.40844	8.63608	6.99775	6.35188	8.25611	6.54399	7.04256	6.61593
MXRA5	6.50939	6.17635	8.60281	6.56523	7.4989	5.75267	8.06944	6.2961	6.17128	6.01849	7.09397	6.05311	5.45574	7.62574	5.77536	5.97271	5.94068	6.40406	5.64885	6.51885	6.49822	6.86697	8.21762	8.01624	7.03925	6.65488	6.07116	6.82021	6.32985	6.20017	6.59407	5.79387	8.21184	8.13947	5.93302	6.3216	7.07254	7.785	7.89965	7.22164	5.47863	6.76949	6.15298	5.73649	5.47971	7.56041	8.16629	5.78256	6.08917
ANKRD2	8.7389	10.1368	8.64028	10.6082	7.13572	9.95808	10.1503	10.4233	11.2165	10.7814	10.4455	9.23697	10.7861	9.90428	10.6393	8.71221	11.0329	8.06686	10.8809	9.24275	10.2181	10.0368	8.18862	7.90137	8.55842	10.1061	10.2835	10.2937	8.99374	9.69199	7.38547	9.28369	9.16063	9.03461	10.3588	10.4523	9.91467	10.1773	9.8883	10.4253	9.50211	9.84622	10.8608	11.0655	9.01802	9.14359	8.97347	9.39751	9.73908
ADAMTS4	5.45423	5.7842	7.61542	5.64514	5.56824	6.27027	5.7636	6.54272	6.71454	5.75942	5.97342	8.27062	6.6231	6.43267	8.35758	6.13584	6.71324	4.6106	6.45598	6.65179	5.88516	6.44457	7.13497	6.43111	5.57564	6.92982	5.89796	6.77281	5.97155	6.87584	5.53339	5.99443	7.11316	6.6285	6.7883	6.45744	6.30225	8.20684	4.83702	7.42911	6.44414	8.4104	6.53458	6.63167	6.23167	8.42111	6.76646	7.74435	7.41426
MGST1	7.02202	6.48555	7.00059	7.13034	8.63173	7.77512	7.17869	7.54397	7.67993	6.89259	6.87054	9.52545	7.76296	8.00404	6.83205	8.04654	7.9604	6.32002	7.19032	7.59208	7.35994	7.26647	7.35477	5.31364	6.88246	7.57796	6.6613	7.72279	6.79057	7.51344	6.75186	7.46313	7.63384	7.27855	9.62463	8.14357	8.19778	6.25334	6.67471	7.59412	7.25703	7.81421	7.38829	7.05882	8.25408	7.39001	7.67166	7.41089	7.57065
DSC1	5.91492	6.61237	7.28141	6.51802	5.47185	5.0276	6.08998	6.53919	6.71692	5.53224	6.90183	6.12271	7.14842	5.86857	7.33325	5.29484	5.88377	7.43526	6.51931	7.74841	7.34452	4.95633	4.64989	5.97535	6.79563	5.16788	7.65512	7.55619	6.61888	6.62854	7.62269	5.78225	6.11341	5.13496	4.58111	6.23478	5.20212	4.48055	7.63688	6.09864	7.17619	6.08735	6.50492	7.52437	4.91833	6.23602	5.25349	7.84442	6.38192
AOX1	4.89047	5.14464	4.95208	5.09484	5.75923	5.95964	6.07255	5.58383	6.60866	5.11256	5.9428	8.1607	6.82718	6.58369	5.82943	6.92382	7.28524	5.74506	6.34705	5.99019	5.70355	4.84249	4.19859	4.17725	5.63139	6.35103	5.69679	5.84475	5.75653	6.70736	6.38029	5.7385	5.55106	4.9225	6.78858	6.72084	6.04151	4.48977	6.0015	5.18308	5.91073	6.80544	5.47107	5.27331	6.6695	6.87584	5.04258	7.29538	6.07692
C6	8.61936	7.2207	9.0887	7.80855	7.74098	8.83843	8.56593	9.93562	8.47194	7.81557	8.04975	8.20935	8.11861	7.97131	7.40282	7.8983	5.43795	10.0878	8.12845	7.01527	7.51836	4.98286	5.99538	8.72555	9.17749	8.14272	9.19708	8.20212	9.13194	7.33644	7.60925	8.18368	6.59284	6.5372	6.36964	8.18634	8.48891	6.24008	8.95028	5.99002	8.62304	6.97977	6.20987	6.84478	7.62283	7.38026	9.18615	7.86199	9.76318
CYP4B1	5.62824	6.93091	6.73783	7.0575	5.94508	8.6781	7.58418	7.10631	8.52653	6.90787	8.50901	8.85297	8.6154	8.22535	7.77379	7.86855	8.87389	7.50534	8.20569	7.95857	7.43375	4.96979	5.47681	5.74846	7.86057	8.56363	7.01044	8.30182	7.78005	8.41344	8.49271	7.68471	7.62193	6.408	7.68976	8.35843	8.02838	5.82236	8.51139	7.60301	7.65194	8.34336	8.5056	8.49567	8.12109	7.877	5.94728	8.25794	8.97619
MIR208A	3.70734	4.36404	4.183	4.77932	4.5503	4.44164	4.42886	6.06926	4.98822	5.77618	6.17875	4.9338	5.68147	4.90198	5.68237	6.69996	4.15977	4.34008	6.45929	7.01977	4.13946	6.43099	5.7839	4.53031	5.81945	3.79721	5.99545	4.06386	5.73616	5.93371	6.24869	4.16979	6.17911	7.44821	6.54387	5.97295	6.67324	6.10052	3.80199	6.48245	5.7262	5.98989	3.52607	4.22546	7.59676	6.90171	3.17993	5.54263	7.05413
HBB	9.05374	8.61115	7.64869	4.73476	9.37958	8.52288	5.49138	4.84502	4.84824	2.89961	4.73357	5.98389	6.86226	5.03704	4.9805	4.4573	3.00075	5.55043	7.16791	4.32435	7.55158	4.10657	7.31708	7.9208	7.92218	4.05481	6.9433	4.26751	6.25062	5.41884	8.31736	5.77583	7.70058	7.32951	8.35633	7.93624	8.1104	8.8465	5.88248	3.54931	3.8474	5.65219	5.07888	3.20654	3.6559	7.76216	5.88331	6.66633	3.11653
SERPINE1	6.31006	7.89162	5.73537	7.66138	5.97437	7.21242	7.46224	6.99932	6.88469	8.60975	7.37446	6.69265	7.25418	7.52631	8.61002	6.30869	8.77128	5.10739	6.67483	7.19618	7.26886	8.98664	9.36593	5.25783	6.09679	7.50586	5.05642	6.79566	6.19954	6.96524	7.67005	6.7663	8.6352	10.9143	9.65015	8.09142	7.35364	11.2019	5.72138	8.41419	6.70998	7.53853	8.36431	7.1093	6.60053	10.9352	5.99738	7.17245	6.28576
NPPA	6.16747	6.26566	10.6556	6.44468	5.51544	5.65877	6.83497	5.78988	6.25555	6.64505	5.52461	4.78021	7.16273	7.96591	8.10461	8.97957	5.83559	8.09699	6.49554	6.89198	5.38213	9.26237	6.41469	5.74392	8.34468	9.34208	8.52305	7.87144	5.54287	7.55257	7.38135	4.0076	5.7151	6.39627	5.84501	5.51884	5.91469	5.60603	8.23357	7.63507	6.37122	7.41094	9.44041	8.7875	6.75785	8.88138	5.43988	5.82294	7.25524
HMGCS2	4.85323	8.23559	9.52108	5.68658	4.90599	6.62194	6.5834	7.0081	8.4576	8.64182	5.60061	7.79809	9.4377	7.16977	7.36216	7.81529	5.56081	7.74118	7.08351	9.16508	7.88294	5.66965	3.50019	6.84654	8.99697	8.31919	5.97472	8.15872	6.30662	7.05615	10.8746	9.69759	6.19231	4.4284	4.53074	4.56104	4.75605	3.98033	5.58445	8.47975	9.119	7.39762	8.86381	6.13157	9.47577	6.77536	8.54135	8.95223	7.99899
USP9Y	2.90643	7.32347	7.72535	3.30745	7.55741	3.06097	3.14342	3.18895	7.49803	2.95063	3.29846	3.14338	7.20997	4.13135	7.6794	7.612	7.14632	5.32853	7.22095	7.1378	8.96395	7.75006	4.99815	7.35432	5.12084	7.50681	9.38917	3.95372	3.1475	7.10071	7.73576	7.86465	8.40678	7.20978	7.20616	7.59967	4.06834	7.06708	5.36953	7.20311	7.17641	3.44403	3.33754	7.63564	3.36742	6.65006	3.28278	7.24646	7.37344
EIF1AY	2.72369	9.54297	9.63611	1.87717	9.58088	2.87286	2.99214	3.02852	9.42008	3.00939	3.00004	4.01976	9.20803	4.46596	9.77312	9.42545	8.89376	6.11969	8.62393	8.99679	12.0579	9.60365	6.41218	9.42412	5.95623	9.35619	12.3868	4.81644	2.65732	9.30208	9.84559	10.8131	10.9287	9.73522	9.90783	10.4251	4.67751	9.79718	5.56295	8.75601	9.20092	3.3996	3.10315	9.4038	3.45818	8.07978	3.3078	9.09727	9.49213
DDX3Y	2.35193	7.87409	7.17352	2.68684	7.33112	2.67704	2.66641	2.68076	7.06919	2.95237	2.7643	2.65979	6.83188	3.73214	7.66104	7.53815	6.80469	4.59108	7.12129	6.99043	8.89956	7.23296	4.84284	7.1745	5.00388	7.20899	8.8407	4.03815	3.09347	6.92371	7.3882	7.68301	8.24204	8.12716	7.77235	7.47538	3.95957	8.33608	4.48229	6.72179	7.17583	2.99438	2.82782	7.20844	2.58697	7.02432	2.57621	6.99763	7.20898
UTY	3.42691	7.42549	7.22617	2.88611	6.7394	3.27168	2.82699	3.10214	7.19053	2.71655	2.44829	2.77363	7.07064	3.93058	7.67601	7.68885	6.84502	4.81474	7.06972	6.96054	8.78548	7.56759	4.83088	6.90397	4.90288	6.99078	8.9134	4.0103	2.96898	7.06156	7.32633	7.58886	8.48948	7.50559	7.52022	7.67418	3.65667	7.6546	4.79552	7.05696	7.17198	2.76417	2.77147	7.18723	3.12534	6.69775	2.35201	6.9	7.12991
[truncated: 197 more columns]
