# Supplementary material for: Identification MNS1, FRZB, OGN, LUM, SERP1NA3 and FCN3 as the potential immune-related key genes involved in ischaemic cardiomyopathy by random forest and nomogram
Source: Aging (Albany NY). 2023 Feb 27;15(5):1475–95. doi: 10.18632/aging.204547 (PMC10042686; doi:10.18632/aging.204547)
Supplement: Supplementary Table 4 [file aging-15-204547-s005.xls]

## Sheet: Additional Table S4
Supplementary Table 4. KEGG and DO analysis of the 39 DEGs.
Group	ID	Description	GeneRatio	BgRatio	pvalue	p.adjust	qvalue	geneID	Count
KEGG	hsa04610	Complement and coagulation cascades	3/15	85/8145	0.00045588	0.0296322	0.026393	VSIG4/C6/SERPINE1	3
KEGG	hsa05143	African trypanosomiasis	0.133333	37/8145	0.00203137	0.0660196	0.0588029	HBB/NPPA	2
KEGG	hsa00280	Valine, leucine and isoleucine degradation	0.133333	48/8145	0.00340053	0.0736781	0.0656242	AOX1/HMGCS2	2
KEGG	hsa00982	Drug metabolism - cytochrome P450	0.133333	72/8145	0.00751149	0.122062	0.108719	MGST1/AOX1	2
KEGG	hsa04066	HIF-1 signaling pathway	0.133333	109/8145	0.0166319	0.216214	0.192579	SERPINE1/NPPA	2
KEGG	hsa04270	Vascular smooth muscle contraction	0.133333	134/8145	0.0245215	0.26565	0.236611	PLA2G2A/NPPA	2
KEGG	hsa04022	cGMP-PKG signaling pathway	0.133333	167/8145	0.0368348	0.278167	0.24776	MYH6/NPPA	2
KEGG	hsa04310	Wnt signaling pathway	0.133333	167/8145	0.0368348	0.278167	0.24776	FRZB/SFRP4	2
KEGG	hsa00900	Terpenoid backbone biosynthesis	0.0666667	22/8145	0.0397921	0.278167	0.24776	HMGCS2	1
KEGG	hsa00592	alpha-Linolenic acid metabolism	0.0666667	25/8145	0.0451023	0.278167	0.24776	PLA2G2A	1
DO	DOID:12930	dilated cardiomyopathy	4/28	93/8007	0.000282083	0.0682641	0.0599798	MYH6/MIR208A/SERPINE1/NPPA	4
DO	DOID:0060036	intrinsic cardiomyopathy	4/28	135/8007	0.00115579	0.10076	0.0885318	MYH6/MIR208A/SERPINE1/NPPA	4
DO	DOID:1882	atrial heart septal defect	2/28	17/8007	0.00155264	0.10076	0.0885318	MYH6/NPPA	2
DO	DOID:0050700	cardiomyopathy	4/28	149/8007	0.00166545	0.10076	0.0885318	MYH6/MIR208A/SERPINE1/NPPA	4
DO	DOID:1681	heart septal defect	2/28	24/8007	0.00310366	0.142784	0.125456	MYH6/NPPA	2
DO	DOID:8398	osteoarthritis	4/28	187/8007	0.0038031	0.142784	0.125456	FRZB/ASPN/ADAMTS4/SERPINE1	4
DO	DOID:9452	fatty liver disease	3/28	95/8007	0.00427547	0.142784	0.125456	LUM/HBB/SERPINE1	3
DO	DOID:11394	adult respiratory distress syndrome	2/28	31/8007	0.00515059	0.142784	0.125456	PLA2G2A/SERPINE1	2
DO	DOID:1936	atherosclerosis	5/28	344/8007	0.00617685	0.142784	0.125456	CD163/PLA2G2A/ADAMTS4/SERPINE1/NPPA	5
DO	DOID:2348	arteriosclerotic cardiovascular disease	5/28	345/8007	0.00625253	0.142784	0.125456	CD163/PLA2G2A/ADAMTS4/SERPINE1/NPPA	5
DO	DOID:850	lung disease	6/28	499/8007	0.00659907	0.142784	0.125456	RNASE2/IL1RL1/PLA2G2A/HBB/SERPINE1/NPPA	6
DO	DOID:2349	arteriosclerosis	5/28	356/8007	0.00712905	0.142784	0.125456	CD163/PLA2G2A/ADAMTS4/SERPINE1/NPPA	5
DO	DOID:866	vein disease	2/28	38/8007	0.00767023	0.142784	0.125456	SERPINE1/USP9Y	2
DO	DOID:9455	lipid storage disease	3/28	130/8007	0.0101858	0.160569	0.141083	LUM/HBB/SERPINE1	3
DO	DOID:2841	asthma	3/28	134/8007	0.0110596	0.160569	0.141083	RNASE2/IL1RL1/SERPINE1	3
DO	DOID:423	myopathy	5/28	398/8007	0.0112796	0.160569	0.141083	MYH6/MYOT/MIR208A/SERPINE1/NPPA	5
DO	DOID:66	muscle tissue disease	5/28	398/8007	0.0112796	0.160569	0.141083	MYH6/MYOT/MIR208A/SERPINE1/NPPA	5
DO	DOID:0080000	muscular disease	5/28	408/8007	0.0124716	0.167674	0.147326	MYH6/MYOT/MIR208A/SERPINE1/NPPA	5
DO	DOID:9415	allergic asthma	2/28	52/8007	0.0140384	0.169586	0.149005	RNASE2/SERPINE1	2
DO	DOID:3211	lysosomal storage disease	3/28	150/8007	0.0149832	0.169586	0.149005	LUM/HBB/SERPINE1	3
DO	DOID:11162	respiratory failure	2/28	55/8007	0.0156208	0.169586	0.149005	PLA2G2A/SERPINE1	2
DO	DOID:1176	bronchial disease	3/28	153/8007	0.0157961	0.169586	0.149005	RNASE2/IL1RL1/SERPINE1	3
DO	DOID:3856	male reproductive organ cancer	5/28	435/8007	0.0161177	0.169586	0.149005	SERPINA3/SFRP4/ADAMTS9/SERPINE1/USP9Y	5
DO	DOID:1682	congenital heart disease	2/28	58/8007	0.0172764	0.174204	0.153063	MYH6/NPPA	2
DO	DOID:11984	hypertrophic cardiomyopathy	2/28	62/8007	0.0195951	0.18968	0.166661	MYH6/NPPA	2
DO	DOID:2320	obstructive lung disease	4/28	308/8007	0.0212083	0.1974	0.173444	RNASE2/IL1RL1/HBB/SERPINE1	4
DO	DOID:655	inherited metabolic disorder	4/28	331/8007	0.0268098	0.240295	0.211134	LUM/HBB/SERPINE1/NPPA	4
DO	DOID:4766	embryoma	4/28	352/8007	0.0326442	0.266855	0.23447	SFRP4/IL1RL1/PLA2G2A/SERPINE1	4
DO	DOID:1168	familial hyperlipidemia	2/28	82/8007	0.0329715	0.266855	0.23447	SERPINE1/NPPA	2
DO	DOID:2998	testicular cancer	1/28	10/8007	0.0344433	0.266855	0.23447	USP9Y	1
DO	DOID:10273	heart conduction disease	1/28	11/8007	0.037824	0.266855	0.23447	MYH6	1
DO	DOID:688	embryonal cancer	4/28	373/8007	0.0391817	0.266855	0.23447	SFRP4/IL1RL1/PLA2G2A/SERPINE1	4
DO	DOID:3083	chronic obstructive pulmonary disease	3/28	220/8007	0.040457	0.266855	0.23447	IL1RL1/HBB/SERPINE1	3
DO	DOID:3146	lipid metabolism disorder	2/28	92/8007	0.0406822	0.266855	0.23447	SERPINE1/NPPA	2
DO	DOID:12337	varicocele	1/28	12/8007	0.0411933	0.266855	0.23447	USP9Y	1
DO	DOID:9742	pelvic varices	1/28	12/8007	0.0411933	0.266855	0.23447	USP9Y	1
DO	DOID:1785	pituitary cancer	1/28	13/8007	0.0445512	0.266855	0.23447	SFRP4	1
DO	DOID:6000	congestive heart failure	3/28	229/8007	0.0447144	0.266855	0.23447	IL1RL1/MYH6/NPPA	3
DO	DOID:11247	disseminated intravascular coagulation	1/28	14/8007	0.0478978	0.266855	0.23447	SERPINE1	1
DO	DOID:12241	beta thalassemia	1/28	14/8007	0.0478978	0.266855	0.23447	HBB	1
