# Supplementary material for: Identification MNS1, FRZB, OGN, LUM, SERP1NA3 and FCN3 as the potential immune-related key genes involved in ischaemic cardiomyopathy by random forest and nomogram
Source: Aging (Albany NY). 2023 Feb 27;15(5):1475–95. doi: 10.18632/aging.204547 (PMC10042686; doi:10.18632/aging.204547)
Supplement: Supplementary Table 5 [file aging-15-204547-s006.xls]

## Sheet: Additional Table S5
Supplementary Table 5. GO analysis of the 39 DEGs.
Group	ID	Description	GeneRatio	BgRatio	pvalue	p.adjust	qvalue	geneID	Count
BP	GO:0003299	muscle hypertrophy in response to stress	3/39	31/18800	3.56376e-05	0.0113328	0.00926578	MYH6/MIR208A/NPPA	3
BP	GO:0014887	cardiac muscle adaptation	3/39	31/18800	3.56376e-05	0.0113328	0.00926578	MYH6/MIR208A/NPPA	3
BP	GO:0014898	cardiac muscle hypertrophy in response to stress	3/39	31/18800	3.56376e-05	0.0113328	0.00926578	MYH6/MIR208A/NPPA	3
BP	GO:0014888	striated muscle adaptation	3/39	54/18800	0.000190271	0.0453797	0.0371029	MYH6/MIR208A/NPPA	3
BP	GO:0061043	regulation of vascular wound healing	2/39	14/18800	0.000375629	0.0716699	0.0585981	SMOC2/SERPINE1	2
BP	GO:0061042	vascular wound healing	2/39	22/18800	0.000943574	0.105342	0.0861283	SMOC2/SERPINE1	2
BP	GO:0003300	cardiac muscle hypertrophy	3/39	96/18800	0.00103206	0.105342	0.0861283	MYH6/MIR208A/NPPA	3
BP	GO:0019835	cytolysis	2/39	24/18800	0.00112444	0.105342	0.0861283	PLA2G2A/C6	2
BP	GO:0014897	striated muscle hypertrophy	3/39	99/18800	0.00112812	0.105342	0.0861283	MYH6/MIR208A/NPPA	3
BP	GO:0014896	muscle hypertrophy	3/39	101/18800	0.00119519	0.105342	0.0861283	MYH6/MIR208A/NPPA	3
BP	GO:0002274	myeloid leukocyte activation	4/39	232/18800	0.00132444	0.105342	0.0861283	VSIG4/IL1RL1/PLA2G2A/FCER1G	4
BP	GO:0048738	cardiac muscle tissue development	4/39	234/18800	0.00136695	0.105342	0.0861283	MYH6/ADAMTS9/MIR208A/NPPA	4
BP	GO:0014706	striated muscle tissue development	4/39	248/18800	0.00169166	0.105342	0.0861283	MYH6/ADAMTS9/MIR208A/NPPA	4
BP	GO:0070168	negative regulation of biomineral tissue development	2/39	30/18800	0.00175835	0.105342	0.0861283	ASPN/MIR208A	2
BP	GO:0043500	muscle adaptation	3/39	118/18800	0.00186834	0.105342	0.0861283	MYH6/MIR208A/NPPA	3
BP	GO:0060055	angiogenesis involved in wound healing	2/39	31/18800	0.00187716	0.105342	0.0861283	SMOC2/SERPINE1	2
BP	GO:0110150	negative regulation of biomineralization	2/39	31/18800	0.00187716	0.105342	0.0861283	ASPN/MIR208A	2
BP	GO:0003012	muscle system process	5/39	449/18800	0.00224046	0.118745	0.0970868	MYH6/MYOT/ANKRD2/MIR208A/NPPA	5
BP	GO:0006956	complement activation	3/39	131/18800	0.00251578	0.126319	0.10328	FCN3/VSIG4/C6	3
BP	GO:1901385	regulation of voltage-gated calcium channel activity	2/39	38/18800	0.00281207	0.134136	0.109671	MIR208A/NPPA	2
BP	GO:0042119	neutrophil activation	2/39	41/18800	0.00326725	0.144472	0.118122	PLA2G2A/FCER1G	2
BP	GO:0050729	positive regulation of inflammatory response	3/39	145/18800	0.00335168	0.144472	0.118122	IL1RL1/PLA2G2A/SERPINE1	3
BP	GO:0030198	extracellular matrix organization	4/39	307/18800	0.00365703	0.144472	0.118122	SMOC2/LUM/ADAMTS9/ADAMTS4	4
BP	GO:0043062	extracellular structure organization	4/39	308/18800	0.00369966	0.144472	0.118122	SMOC2/LUM/ADAMTS9/ADAMTS4	4
BP	GO:0045229	external encapsulating structure organization	4/39	310/18800	0.00378595	0.144472	0.118122	SMOC2/LUM/ADAMTS9/ADAMTS4	4
BP	GO:0030856	regulation of epithelial cell differentiation	3/39	157/18800	0.00418913	0.150999	0.123459	FRZB/SFRP4/SERPINE1	3
BP	GO:0036230	granulocyte activation	2/39	47/18800	0.00427357	0.150999	0.123459	PLA2G2A/FCER1G	2
BP	GO:0006953	acute-phase response	2/39	48/18800	0.00445356	0.151739	0.124063	SERPINA3/CD163	2
BP	GO:0048260	positive regulation of receptor-mediated endocytosis	2/39	53/18800	0.00540522	0.177813	0.145382	SFRP4/SERPINE1	2
BP	GO:0006936	muscle contraction	4/39	349/18800	0.00575327	0.17879	0.146181	MYH6/MYOT/ANKRD2/NPPA	4
BP	GO:0003179	heart valve morphogenesis	2/39	55/18800	0.00580975	0.17879	0.146181	ADAMTS9/NPPA	2
BP	GO:0003229	ventricular cardiac muscle tissue development	2/39	56/18800	0.00601707	0.179384	0.146666	MYH6/ADAMTS9	2
BP	GO:0008217	regulation of blood pressure	3/39	183/18800	0.00641051	0.180748	0.147782	MYH6/HBB/NPPA	3
BP	GO:0090303	positive regulation of wound healing	2/39	58/18800	0.00644176	0.180748	0.147782	SMOC2/SERPINE1	2
BP	GO:0043030	regulation of macrophage activation	2/39	62/18800	0.00733093	0.19982	0.163375	VSIG4/IL1RL1	2
BP	GO:0003170	heart valve development	2/39	65/18800	0.00803217	0.204973	0.167588	ADAMTS9/NPPA	2
BP	GO:0030858	positive regulation of epithelial cell differentiation	2/39	65/18800	0.00803217	0.204973	0.167588	SFRP4/SERPINE1	2
BP	GO:0002253	activation of immune response	4/39	386/18800	0.00816455	0.204973	0.167588	FCN3/VSIG4/FCER1G/C6	4
BP	GO:0008016	regulation of heart contraction	3/39	211/18800	0.0094636	0.212777	0.173969	MYH6/MIR208A/NPPA	3
BP	GO:0050766	positive regulation of phagocytosis	2/39	71/18800	0.00952145	0.212777	0.173969	FCN3/FCER1G	2
BP	GO:0060537	muscle tissue development	4/39	405/18800	0.009628	0.212777	0.173969	MYH6/ADAMTS9/MIR208A/NPPA	4
BP	GO:0035567	non-canonical Wnt signaling pathway	2/39	72/18800	0.00978075	0.212777	0.173969	FRZB/SFRP4	2
BP	GO:1903036	positive regulation of response to wounding	2/39	72/18800	0.00978075	0.212777	0.173969	SMOC2/SERPINE1	2
BP	GO:0060420	regulation of heart growth	2/39	74/18800	0.0103087	0.212777	0.173969	MYH6/MIR208A	2
BP	GO:0007596	blood coagulation	3/39	221/18800	0.0107276	0.212777	0.173969	FCER1G/HBB/SERPINE1	3
BP	GO:0050817	coagulation	3/39	226/18800	0.0113947	0.212777	0.173969	FCER1G/HBB/SERPINE1	3
BP	GO:0007599	hemostasis	3/39	227/18800	0.0115309	0.212777	0.173969	FCER1G/HBB/SERPINE1	3
BP	GO:0042060	wound healing	4/39	429/18800	0.0117091	0.212777	0.173969	SMOC2/FCER1G/HBB/SERPINE1	4
BP	GO:0055013	cardiac muscle cell development	2/39	81/18800	0.0122538	0.212777	0.173969	MYH6/MIR208A	2
BP	GO:0007160	cell-matrix adhesion	3/39	235/18800	0.0126549	0.212777	0.173969	LYVE1/ADAMTS9/SERPINE1	3
BP	GO:0032103	positive regulation of response to external stimulus	4/39	442/18800	0.012949	0.212777	0.173969	SMOC2/IL1RL1/PLA2G2A/SERPINE1	4
BP	GO:0055006	cardiac cell development	2/39	87/18800	0.0140388	0.212777	0.173969	MYH6/MIR208A	2
BP	GO:0006898	receptor-mediated endocytosis	3/39	246/18800	0.0143001	0.212777	0.173969	SFRP4/FCER1G/SERPINE1	3
BP	GO:0060047	heart contraction	3/39	247/18800	0.0144554	0.212777	0.173969	MYH6/MIR208A/NPPA	3
BP	GO:1901019	regulation of calcium ion transmembrane transporter activity	2/39	91/18800	0.0152876	0.212777	0.173969	MIR208A/NPPA	2
BP	GO:0003015	heart process	3/39	257/18800	0.0160619	0.212777	0.173969	MYH6/MIR208A/NPPA	3
BP	GO:0071559	response to transforming growth factor beta	3/39	258/18800	0.0162278	0.212777	0.173969	ASPN/MXRA5/USP9Y	3
BP	GO:1904035	regulation of epithelial cell apoptotic process	2/39	94/18800	0.0162546	0.212777	0.173969	SFRP4/SERPINE1	2
BP	GO:0001819	positive regulation of cytokine production	4/39	475/18800	0.016467	0.212777	0.173969	LUM/IL1RL1/FCER1G/SERPINE1	4
BP	GO:1903522	regulation of blood circulation	3/39	260/18800	0.0165627	0.212777	0.173969	MYH6/MIR208A/NPPA	3
BP	GO:0060419	heart growth	2/39	96/18800	0.0169135	0.212777	0.173969	MYH6/MIR208A	2
BP	GO:0045807	positive regulation of endocytosis	2/39	97/18800	0.0172471	0.212777	0.173969	SFRP4/SERPINE1	2
BP	GO:0050764	regulation of phagocytosis	2/39	99/18800	0.0179229	0.212777	0.173969	FCN3/FCER1G	2
BP	GO:0098869	cellular oxidant detoxification	2/39	100/18800	0.018265	0.212777	0.173969	MGST1/HBB	2
BP	GO:0046620	regulation of organ growth	2/39	101/18800	0.0186098	0.212777	0.173969	MYH6/MIR208A	2
BP	GO:0070167	regulation of biomineral tissue development	2/39	101/18800	0.0186098	0.212777	0.173969	ASPN/MIR208A	2
BP	GO:0110149	regulation of biomineralization	2/39	103/18800	0.0193078	0.212777	0.173969	ASPN/MIR208A	2
BP	GO:0002027	regulation of heart rate	2/39	105/18800	0.0200167	0.212777	0.173969	MYH6/NPPA	2
BP	GO:0042116	macrophage activation	2/39	106/18800	0.0203752	0.212777	0.173969	VSIG4/IL1RL1	2
BP	GO:0007168	receptor guanylyl cyclase signaling pathway	1/39	10/18800	0.020557	0.212777	0.173969	NPPA	1
BP	GO:0032754	positive regulation of interleukin-5 production	1/39	10/18800	0.020557	0.212777	0.173969	IL1RL1	1
BP	GO:0051918	negative regulation of fibrinolysis	1/39	10/18800	0.020557	0.212777	0.173969	SERPINE1	1
BP	GO:0070327	thyroid hormone transport	1/39	10/18800	0.020557	0.212777	0.173969	SLCO4A1	1
BP	GO:1902224	ketone body metabolic process	1/39	10/18800	0.020557	0.212777	0.173969	HMGCS2	1
BP	GO:1903027	regulation of opsonization	1/39	10/18800	0.020557	0.212777	0.173969	FCN3	1
BP	GO:0048259	regulation of receptor-mediated endocytosis	2/39	110/18800	0.0218361	0.212777	0.173969	SFRP4/SERPINE1	2
BP	GO:0031349	positive regulation of defense response	3/39	289/18800	0.0218575	0.212777	0.173969	IL1RL1/PLA2G2A/SERPINE1	3
BP	GO:0051607	defense response to virus	3/39	290/18800	0.0220548	0.212777	0.173969	FCN3/RNASE2/IFI44L	3
BP	GO:0140546	defense response to symbiont	3/39	291/18800	0.0222531	0.212777	0.173969	FCN3/RNASE2/IFI44L	3
BP	GO:0006182	cGMP biosynthetic process	1/39	11/18800	0.0225899	0.212777	0.173969	NPPA	1
BP	GO:0007494	midgut development	1/39	11/18800	0.0225899	0.212777	0.173969	HMGCS2	1
BP	GO:0043619	regulation of transcription from RNA polymerase II promoter in response to oxidative stress	1/39	11/18800	0.0225899	0.212777	0.173969	ANKRD2	1
BP	GO:0086016	AV node cell action potential	1/39	11/18800	0.0225899	0.212777	0.173969	MIR208A	1
BP	GO:0086027	AV node cell to bundle of His cell signaling	1/39	11/18800	0.0225899	0.212777	0.173969	MIR208A	1
BP	GO:0099624	atrial cardiac muscle cell membrane repolarization	1/39	11/18800	0.0225899	0.212777	0.173969	NPPA	1
BP	GO:0002526	acute inflammatory response	2/39	113/18800	0.0229597	0.212777	0.173969	SERPINA3/CD163	2
BP	GO:0031623	receptor internalization	2/39	113/18800	0.0229597	0.212777	0.173969	SFRP4/FCER1G	2
BP	GO:1990748	cellular detoxification	2/39	115/18800	0.0237218	0.212777	0.173969	MGST1/HBB	2
BP	GO:0001867	complement activation, lectin pathway	1/39	12/18800	0.0246187	0.212777	0.173969	FCN3	1
BP	GO:0010455	positive regulation of cell fate commitment	1/39	12/18800	0.0246187	0.212777	0.173969	MIR208A	1
BP	GO:0032908	regulation of transforming growth factor beta1 production	1/39	12/18800	0.0246187	0.212777	0.173969	LUM	1
BP	GO:0033629	negative regulation of cell adhesion mediated by integrin	1/39	12/18800	0.0246187	0.212777	0.173969	SERPINE1	1
BP	GO:0045916	negative regulation of complement activation	1/39	12/18800	0.0246187	0.212777	0.173969	VSIG4	1
BP	GO:0070170	regulation of tooth mineralization	1/39	12/18800	0.0246187	0.212777	0.173969	ASPN	1
BP	GO:0086067	AV node cell to bundle of His cell communication	1/39	12/18800	0.0246187	0.212777	0.173969	MIR208A	1
BP	GO:1904019	epithelial cell apoptotic process	2/39	118/18800	0.0248844	0.212777	0.173969	SFRP4/SERPINE1	2
BP	GO:0030282	bone mineralization	2/39	121/18800	0.02607	0.212777	0.173969	ASPN/MIR208A	2
BP	GO:0055007	cardiac muscle cell differentiation	2/39	121/18800	0.02607	0.212777	0.173969	MYH6/MIR208A	2
BP	GO:0055062	phosphate ion homeostasis	1/39	13/18800	0.0266434	0.212777	0.173969	SFRP4	1
BP	GO:0072506	trivalent inorganic anion homeostasis	1/39	13/18800	0.0266434	0.212777	0.173969	SFRP4	1
BP	GO:0097237	cellular response to toxic substance	2/39	123/18800	0.026873	0.212777	0.173969	MGST1/HBB	2
BP	GO:0090287	regulation of cellular response to growth factor stimulus	3/39	314/18800	0.0270852	0.212777	0.173969	SMOC2/SFRP4/ASPN	3
BP	GO:0060326	cell chemotaxis	3/39	315/18800	0.0273071	0.212777	0.173969	SMOC2/FCER1G/SERPINE1	3
BP	GO:0006959	humoral immune response	3/39	317/18800	0.0277539	0.212777	0.173969	FCN3/VSIG4/C6	3
BP	GO:0007512	adult heart development	1/39	14/18800	0.028664	0.212777	0.173969	MYH6	1
BP	GO:0014744	positive regulation of muscle adaptation	1/39	14/18800	0.028664	0.212777	0.173969	MIR208A	1
BP	GO:0030049	muscle filament sliding	1/39	14/18800	0.028664	0.212777	0.173969	MYH6	1
BP	GO:0045989	positive regulation of striated muscle contraction	1/39	14/18800	0.028664	0.212777	0.173969	NPPA	1
BP	GO:0048070	regulation of developmental pigmentation	1/39	14/18800	0.028664	0.212777	0.173969	ADAMTS9	1
BP	GO:0051917	regulation of fibrinolysis	1/39	14/18800	0.028664	0.212777	0.173969	SERPINE1	1
BP	GO:0070986	left/right axis specification	1/39	14/18800	0.028664	0.212777	0.173969	MNS1	1
BP	GO:0120305	regulation of pigmentation	1/39	14/18800	0.028664	0.212777	0.173969	ADAMTS9	1
BP	GO:1901841	regulation of high voltage-gated calcium channel activity	1/39	14/18800	0.028664	0.212777	0.173969	NPPA	1
BP	GO:0045931	positive regulation of mitotic cell cycle	2/39	128/18800	0.0289241	0.212777	0.173969	SMOC2/MIR208A	2
BP	GO:0030168	platelet activation	2/39	130/18800	0.0297616	0.212777	0.173969	FCER1G/HBB	2
BP	GO:0042476	odontogenesis	2/39	130/18800	0.0297616	0.212777	0.173969	ASPN/SERPINE1	2
BP	GO:0010755	regulation of plasminogen activation	1/39	15/18800	0.0306805	0.212777	0.173969	SERPINE1	1
BP	GO:0015671	oxygen transport	1/39	15/18800	0.0306805	0.212777	0.173969	HBB	1
BP	GO:0032905	transforming growth factor beta1 production	1/39	15/18800	0.0306805	0.212777	0.173969	LUM	1
BP	GO:0043252	sodium-independent organic anion transport	1/39	15/18800	0.0306805	0.212777	0.173969	SLCO4A1	1
BP	GO:0060026	convergent extension	1/39	15/18800	0.0306805	0.212777	0.173969	FRZB	1
BP	GO:0070365	hepatocyte differentiation	1/39	15/18800	0.0306805	0.212777	0.173969	FRZB	1
BP	GO:0090281	negative regulation of calcium ion import	1/39	15/18800	0.0306805	0.212777	0.173969	MIR208A	1
BP	GO:1902514	regulation of calcium ion transmembrane transport via high voltage-gated calcium channel	1/39	15/18800	0.0306805	0.212777	0.173969	NPPA	1
BP	GO:1902563	regulation of neutrophil activation	1/39	15/18800	0.0306805	0.212777	0.173969	PLA2G2A	1
BP	GO:2001028	positive regulation of endothelial cell chemotaxis	1/39	15/18800	0.0306805	0.212777	0.173969	SMOC2	1
BP	GO:0061041	regulation of wound healing	2/39	133/18800	0.0310361	0.212777	0.173969	SMOC2/SERPINE1	2
BP	GO:0001889	liver development	2/39	134/18800	0.0314657	0.212777	0.173969	FRZB/HMGCS2	2
BP	GO:0002921	negative regulation of humoral immune response	1/39	16/18800	0.0326929	0.212777	0.173969	VSIG4	1
BP	GO:0006857	oligopeptide transport	1/39	16/18800	0.0326929	0.212777	0.173969	MGST1	1
BP	GO:0008228	opsonization	1/39	16/18800	0.0326929	0.212777	0.173969	FCN3	1
BP	GO:0033275	actin-myosin filament sliding	1/39	16/18800	0.0326929	0.212777	0.173969	MYH6	1
BP	GO:0034374	low-density lipoprotein particle remodeling	1/39	16/18800	0.0326929	0.212777	0.173969	PLA2G2A	1
BP	GO:0043508	negative regulation of JUN kinase activity	1/39	16/18800	0.0326929	0.212777	0.173969	NPPA	1
BP	GO:0046068	cGMP metabolic process	1/39	16/18800	0.0326929	0.212777	0.173969	NPPA	1
BP	GO:0061008	hepaticobiliary system development	2/39	137/18800	0.0327687	0.212777	0.173969	FRZB/HMGCS2	2
BP	GO:0060048	cardiac muscle contraction	2/39	138/18800	0.0332077	0.212777	0.173969	MYH6/NPPA	2
BP	GO:0050921	positive regulation of chemotaxis	2/39	140/18800	0.0340927	0.212777	0.173969	SMOC2/SERPINE1	2
BP	GO:0045765	regulation of angiogenesis	3/39	345/18800	0.0344199	0.212777	0.173969	SMOC2/ADAMTS9/SERPINE1	3
BP	GO:0002687	positive regulation of leukocyte migration	2/39	141/18800	0.0345387	0.212777	0.173969	LYVE1/SERPINE1	2
BP	GO:0016114	terpenoid biosynthetic process	1/39	17/18800	0.0347012	0.212777	0.173969	HMGCS2	1
BP	GO:0033194	response to hydroperoxide	1/39	17/18800	0.0347012	0.212777	0.173969	MGST1	1
BP	GO:0061577	calcium ion transmembrane transport via high voltage-gated calcium channel	1/39	17/18800	0.0347012	0.212777	0.173969	NPPA	1
BP	GO:0090399	replicative senescence	1/39	17/18800	0.0347012	0.212777	0.173969	SERPINE1	1
BP	GO:1903818	positive regulation of voltage-gated potassium channel activity	1/39	17/18800	0.0347012	0.212777	0.173969	NPPA	1
BP	GO:0090090	negative regulation of canonical Wnt signaling pathway	2/39	142/18800	0.034987	0.212777	0.173969	FRZB/SFRP4	2
BP	GO:1901342	regulation of vasculature development	3/39	351/18800	0.0359479	0.212777	0.173969	SMOC2/ADAMTS9/SERPINE1	3
BP	GO:0002693	positive regulation of cellular extravasation	1/39	18/18800	0.0367055	0.212777	0.173969	LYVE1	1
BP	GO:0006957	complement activation, alternative pathway	1/39	18/18800	0.0367055	0.212777	0.173969	VSIG4	1
BP	GO:0010612	regulation of cardiac muscle adaptation	1/39	18/18800	0.0367055	0.212777	0.173969	MIR208A	1
BP	GO:1903242	regulation of cardiac muscle hypertrophy in response to stress	1/39	18/18800	0.0367055	0.212777	0.173969	MIR208A	1
BP	GO:0016525	negative regulation of angiogenesis	2/39	149/18800	0.0381882	0.212777	0.173969	ADAMTS9/SERPINE1	2
BP	GO:0015711	organic anion transport	3/39	361/18800	0.0385718	0.212777	0.173969	SLCO4A1/PLA2G2A/MGST1	3
BP	GO:0098754	detoxification	2/39	150/18800	0.0386544	0.212777	0.173969	MGST1/HBB	2
BP	GO:0002283	neutrophil activation involved in immune response	1/39	19/18800	0.0387058	0.212777	0.173969	FCER1G	1
BP	GO:0010744	positive regulation of macrophage derived foam cell differentiation	1/39	19/18800	0.0387058	0.212777	0.173969	PLA2G2A	1
BP	GO:0032634	interleukin-5 production	1/39	19/18800	0.0387058	0.212777	0.173969	IL1RL1	1
BP	GO:0032674	regulation of interleukin-5 production	1/39	19/18800	0.0387058	0.212777	0.173969	IL1RL1	1
BP	GO:0043031	negative regulation of macrophage activation	1/39	19/18800	0.0387058	0.212777	0.173969	VSIG4	1
BP	GO:1901386	negative regulation of voltage-gated calcium channel activity	1/39	19/18800	0.0387058	0.212777	0.173969	MIR208A	1
BP	GO:2000181	negative regulation of blood vessel morphogenesis	2/39	151/18800	0.0391228	0.212777	0.173969	ADAMTS9/SERPINE1	2
BP	GO:0031589	cell-substrate adhesion	3/39	364/18800	0.0393778	0.212777	0.173969	LYVE1/ADAMTS9/SERPINE1	3
BP	GO:0042742	defense response to bacterium	3/39	364/18800	0.0393778	0.212777	0.173969	PLA2G2A/FCER1G/SERPINE1	3
BP	GO:1901343	negative regulation of vasculature development	2/39	152/18800	0.0395935	0.212777	0.173969	ADAMTS9/SERPINE1	2
BP	GO:0035051	cardiocyte differentiation	2/39	153/18800	0.0400663	0.212777	0.173969	MYH6/MIR208A	2
BP	GO:0007178	transmembrane receptor protein serine/threonine kinase signaling pathway	3/39	368/18800	0.0404659	0.212777	0.173969	SFRP4/ASPN/USP9Y	3
BP	GO:0003228	atrial cardiac muscle tissue development	1/39	20/18800	0.040702	0.212777	0.173969	MYH6	1
BP	GO:0010523	negative regulation of calcium ion transport into cytosol	1/39	20/18800	0.040702	0.212777	0.173969	MIR208A	1
BP	GO:0061050	regulation of cell growth involved in cardiac muscle cell development	1/39	20/18800	0.040702	0.212777	0.173969	MIR208A	1
BP	GO:0070293	renal absorption	1/39	20/18800	0.040702	0.212777	0.173969	HBB	1
BP	GO:0090026	positive regulation of monocyte chemotaxis	1/39	20/18800	0.040702	0.212777	0.173969	SERPINE1	1
BP	GO:0097623	potassium ion export across plasma membrane	1/39	20/18800	0.040702	0.212777	0.173969	NPPA	1
BP	GO:0002460	adaptive immune response based on somatic recombination of immune receptors built from immunoglobulin superfamily domains	3/39	370/18800	0.0410157	0.212777	0.173969	IL1RL1/FCER1G/C6	3
BP	GO:0043271	negative regulation of ion transport	2/39	155/18800	0.0410183	0.212777	0.173969	SFRP4/MIR208A	2
BP	GO:1903169	regulation of calcium ion transmembrane transport	2/39	156/18800	0.0414976	0.212777	0.173969	MIR208A/NPPA	2
BP	GO:0003085	negative regulation of systemic arterial blood pressure	1/39	21/18800	0.0426941	0.212777	0.173969	NPPA	1
BP	GO:0015669	gas transport	1/39	21/18800	0.0426941	0.212777	0.173969	HBB	1
BP	GO:0030449	regulation of complement activation	1/39	21/18800	0.0426941	0.212777	0.173969	VSIG4	1
BP	GO:0030502	negative regulation of bone mineralization	1/39	21/18800	0.0426941	0.212777	0.173969	MIR208A	1
BP	GO:0033762	response to glucagon	1/39	21/18800	0.0426941	0.212777	0.173969	HMGCS2	1
BP	GO:0071404	cellular response to low-density lipoprotein particle stimulus	1/39	21/18800	0.0426941	0.212777	0.173969	FCER1G	1
BP	GO:0071636	positive regulation of transforming growth factor beta production	1/39	21/18800	0.0426941	0.212777	0.173969	LUM	1
BP	GO:1902259	regulation of delayed rectifier potassium channel activity	1/39	21/18800	0.0426941	0.212777	0.173969	NPPA	1
BP	GO:0050878	regulation of body fluid levels	3/39	382/18800	0.0443945	0.212777	0.173969	FCER1G/HBB/SERPINE1	3
BP	GO:0030509	BMP signaling pathway	2/39	162/18800	0.0444177	0.212777	0.173969	SFRP4/USP9Y	2
BP	GO:0009190	cyclic nucleotide biosynthetic process	1/39	22/18800	0.0446822	0.212777	0.173969	NPPA	1
BP	GO:0030277	maintenance of gastrointestinal epithelium	1/39	22/18800	0.0446822	0.212777	0.173969	SERPINA3	1
BP	GO:0046597	negative regulation of viral entry into host cell	1/39	22/18800	0.0446822	0.212777	0.173969	FCN3	1
BP	GO:0052652	cyclic purine nucleotide metabolic process	1/39	22/18800	0.0446822	0.212777	0.173969	NPPA	1
BP	GO:0060972	left/right pattern formation	1/39	22/18800	0.0446822	0.212777	0.173969	MNS1	1
BP	GO:0086012	membrane depolarization during cardiac muscle cell action potential	1/39	22/18800	0.0446822	0.212777	0.173969	MIR208A	1
BP	GO:0050900	leukocyte migration	3/39	384/18800	0.044971	0.212777	0.173969	LYVE1/FCER1G/SERPINE1	3
BP	GO:1903034	regulation of response to wounding	2/39	166/18800	0.046406	0.212777	0.173969	SMOC2/SERPINE1	2
BP	GO:0030194	positive regulation of blood coagulation	1/39	23/18800	0.0466663	0.212777	0.173969	SERPINE1	1
BP	GO:1900048	positive regulation of hemostasis	1/39	23/18800	0.0466663	0.212777	0.173969	SERPINE1	1
BP	GO:0009615	response to virus	3/39	392/18800	0.0473143	0.212777	0.173969	FCN3/RNASE2/IFI44L	3
BP	GO:0007156	homophilic cell adhesion via plasma membrane adhesion molecules	2/39	168/18800	0.0474123	0.212777	0.173969	MYOT/DSC1	2
BP	GO:0050727	regulation of inflammatory response	3/39	394/18800	0.0479096	0.212777	0.173969	IL1RL1/PLA2G2A/SERPINE1	3
BP	GO:1901136	carbohydrate derivative catabolic process	2/39	169/18800	0.0479186	0.212777	0.173969	LYVE1/ADAMTS9	2
BP	GO:0031214	biomineral tissue development	2/39	170/18800	0.0484268	0.212777	0.173969	ASPN/MIR208A	2
BP	GO:0048660	regulation of smooth muscle cell proliferation	2/39	170/18800	0.0484268	0.212777	0.173969	OGN/MIR208A	2
BP	GO:0035994	response to muscle stretch	1/39	24/18800	0.0486464	0.212777	0.173969	NPPA	1
BP	GO:0038095	Fc-epsilon receptor signaling pathway	1/39	24/18800	0.0486464	0.212777	0.173969	FCER1G	1
BP	GO:0042730	fibrinolysis	1/39	24/18800	0.0486464	0.212777	0.173969	SERPINE1	1
BP	GO:0050820	positive regulation of coagulation	1/39	24/18800	0.0486464	0.212777	0.173969	SERPINE1	1
BP	GO:0060563	neuroepithelial cell differentiation	1/39	24/18800	0.0486464	0.212777	0.173969	SERPINE1	1
BP	GO:0090103	cochlea morphogenesis	1/39	24/18800	0.0486464	0.212777	0.173969	FRZB	1
BP	GO:1903792	negative regulation of anion transport	1/39	24/18800	0.0486464	0.212777	0.173969	SFRP4	1
BP	GO:2001026	regulation of endothelial cell chemotaxis	1/39	24/18800	0.0486464	0.212777	0.173969	SMOC2	1
BP	GO:0110148	biomineralization	2/39	172/18800	0.0494492	0.212777	0.173969	ASPN/MIR208A	2
BP	GO:0048659	smooth muscle cell proliferation	2/39	173/18800	0.0499633	0.212777	0.173969	OGN/MIR208A	2
BP	GO:0071772	response to BMP	2/39	173/18800	0.0499633	0.212777	0.173969	SFRP4/USP9Y	2
BP	GO:0071773	cellular response to BMP stimulus	2/39	173/18800	0.0499633	0.212777	0.173969	SFRP4/USP9Y	2
CC	GO:0062023	collagen-containing extracellular matrix	11/39	429/19594	4.71054e-10	4.33369e-08	2.62798e-08	SERPINA3/FCN3/SMOC2/LUM/OGN/ASPN/ADAMTS9/MXRA5/ADAMTS4/SERPINE1/NPPA	11
CC	GO:0005775	vacuolar lumen	4/39	174/19594	0.000387675	0.017833	0.0108141	SERPINA3/LUM/OGN/RNASE2	4
CC	GO:0031674	I band	3/39	139/19594	0.00264878	0.0552208	0.0334863	MYH6/MYOT/ANKRD2	3
CC	GO:0072562	blood microparticle	3/39	147/19594	0.00310252	0.0552208	0.0334863	SERPINA3/FCN3/HBB	3
CC	GO:0005766	primary lysosome	3/39	155/19594	0.00360136	0.0552208	0.0334863	SERPINA3/RNASE2/MGST1	3
CC	GO:0042582	azurophil granule	3/39	155/19594	0.00360136	0.0552208	0.0334863	SERPINA3/RNASE2/MGST1	3
CC	GO:0070820	tertiary granule	3/39	164/19594	0.00421817	0.0554389	0.0336185	FCER1G/DSC1/HBB	3
CC	GO:0101002	ficolin-1-rich granule	3/39	185/19594	0.00589602	0.0670584	0.0406647	FCER1G/DSC1/HBB	3
CC	GO:0101003	ficolin-1-rich granule membrane	2/39	61/19594	0.00656006	0.0670584	0.0406647	FCER1G/DSC1	2
CC	GO:0031093	platelet alpha granule lumen	2/39	67/19594	0.0078666	0.0689403	0.0418059	SERPINA3/SERPINE1	2
CC	GO:0030017	sarcomere	3/39	209/19594	0.00824286	0.0689403	0.0418059	MYH6/MYOT/ANKRD2	3
CC	GO:0030016	myofibril	3/39	228/19594	0.0104406	0.0800443	0.0485395	MYH6/MYOT/ANKRD2	3
CC	GO:0043292	contractile fiber	3/39	238/19594	0.0117214	0.0813039	0.0493033	MYH6/MYOT/ANKRD2	3
CC	GO:0005581	collagen trimer	2/39	86/19594	0.0126994	0.0813039	0.0493033	FCN3/LUM	2
CC	GO:0031091	platelet alpha granule	2/39	91/19594	0.0141398	0.0813039	0.0493033	SERPINA3/SERPINE1	2
CC	GO:0035578	azurophil granule lumen	2/39	91/19594	0.0141398	0.0813039	0.0493033	SERPINA3/RNASE2	2
CC	GO:0043202	lysosomal lumen	2/39	97/19594	0.0159572	0.0843855	0.051172	LUM/OGN	2
CC	GO:0005796	Golgi lumen	2/39	104/19594	0.018197	0.0843855	0.051172	LUM/OGN	2
CC	GO:0031838	haptoglobin-hemoglobin complex	1/39	11/19594	0.0216833	0.0843855	0.051172	HBB	1
CC	GO:1904090	peptidase inhibitor complex	1/39	11/19594	0.0216833	0.0843855	0.051172	SERPINE1	1
CC	GO:1905286	serine-type peptidase complex	1/39	11/19594	0.0216833	0.0843855	0.051172	FCN3	1
CC	GO:0005583	fibrillar collagen trimer	1/39	12/19594	0.0236317	0.0843855	0.051172	LUM	1
CC	GO:0005833	hemoglobin complex	1/39	12/19594	0.0236317	0.0843855	0.051172	HBB	1
CC	GO:0098643	banded collagen fibril	1/39	12/19594	0.0236317	0.0843855	0.051172	LUM	1
CC	GO:0030667	secretory granule membrane	3/39	312/19594	0.0239545	0.0843855	0.051172	FCER1G/MGST1/DSC1	3
CC	GO:0034774	secretory granule lumen	3/39	322/19594	0.0259861	0.0843855	0.051172	SERPINA3/RNASE2/SERPINE1	3
CC	GO:0030018	Z disc	2/39	127/19594	0.0264177	0.0843855	0.051172	MYH6/MYOT	2
CC	GO:0060205	cytoplasmic vesicle lumen	3/39	325/19594	0.0266132	0.0843855	0.051172	SERPINA3/RNASE2/SERPINE1	3
CC	GO:0031983	vesicle lumen	3/39	327/19594	0.0270358	0.0843855	0.051172	SERPINA3/RNASE2/SERPINE1	3
CC	GO:0044666	MLL3/4 complex	1/39	14/19594	0.027517	0.0843855	0.051172	UTY	1
CC	GO:0005859	muscle myosin complex	1/39	15/19594	0.029454	0.087412	0.0530073	MYH6	1
CC	GO:0016460	myosin II complex	1/39	22/19594	0.0429083	0.11469	0.0695489	MYH6	1
CC	GO:0032982	myosin filament	1/39	22/19594	0.0429083	0.11469	0.0695489	MYH6	1
CC	GO:0098644	complex of collagen trimers	1/39	22/19594	0.0429083	0.11469	0.0695489	LUM	1
CC	GO:0071682	endocytic vesicle lumen	1/39	23/19594	0.0448155	0.11469	0.0695489	HBB	1
CC	GO:0030057	desmosome	1/39	25/19594	0.0486186	0.11469	0.0695489	DSC1	1
CC	GO:0043186	P granule	1/39	25/19594	0.0486186	0.11469	0.0695489	DDX3Y	1
CC	GO:0045495	pole plasm	1/39	25/19594	0.0486186	0.11469	0.0695489	DDX3Y	1
CC	GO:0060293	germ plasm	1/39	25/19594	0.0486186	0.11469	0.0695489	DDX3Y	1
MF	GO:0030021	extracellular matrix structural constituent conferring compression resistance	3/39	22/18410	1.31636e-05	0.00175075	0.00139949	LUM/OGN/ASPN	3
MF	GO:0005201	extracellular matrix structural constituent	4/39	172/18410	0.000468853	0.0311787	0.0249232	LUM/OGN/ASPN/MXRA5	4
MF	GO:0017147	Wnt-protein binding	2/39	30/18410	0.00183221	0.0812281	0.0649311	FRZB/SFRP4	2
MF	GO:0019825	oxygen binding	2/39	39/18410	0.00308379	0.0949322	0.0758856	CYP4B1/HBB	2
MF	GO:0008307	structural constituent of muscle	2/39	42/18410	0.00356888	0.0949322	0.0758856	MYOT/ANKRD2	2
MF	GO:0004601	peroxidase activity	2/39	52/18410	0.00542353	0.119042	0.095158	MGST1/HBB	2
MF	GO:0016684	oxidoreductase activity, acting on peroxide as acceptor	2/39	56/18410	0.00626535	0.119042	0.095158	MGST1/HBB	2
MF	GO:0005518	collagen binding	2/39	68/18410	0.00912103	0.151637	0.121214	LUM/ASPN	2
MF	GO:0016209	antioxidant activity	2/39	85/18410	0.0139751	0.184108	0.14717	MGST1/HBB	2
MF	GO:0004867	serine-type endopeptidase inhibitor activity	2/39	98/18410	0.0182882	0.184108	0.14717	SERPINA3/SERPINE1	2
MF	GO:0031720	haptoglobin binding	1/39	10/18410	0.0209884	0.184108	0.14717	HBB	1
MF	GO:0019864	IgG binding	1/39	11/18410	0.0230635	0.184108	0.14717	FCER1G	1
MF	GO:0043422	protein kinase B binding	1/39	11/18410	0.0230635	0.184108	0.14717	ANKRD2	1
MF	GO:0070410	co-SMAD binding	1/39	11/18410	0.0230635	0.184108	0.14717	USP9Y	1
MF	GO:0004222	metalloendopeptidase activity	2/39	111/18410	0.0230897	0.184108	0.14717	ADAMTS9/ADAMTS4	2
MF	GO:0005344	oxygen carrier activity	1/39	14/18410	0.029263	0.184108	0.14717	HBB	1
MF	GO:0016894	endonuclease activity, active with either ribo- or deoxyribonucleic acids and producing 3'-phosphomonoesters	1/39	15/18410	0.031321	0.184108	0.14717	RNASE2	1
MF	GO:0001846	opsonin binding	1/39	16/18410	0.0333748	0.184108	0.14717	VSIG4	1
MF	GO:0015347	sodium-independent organic anion transmembrane transporter activity	1/39	16/18410	0.0333748	0.184108	0.14717	SLCO4A1	1
MF	GO:0047498	calcium-dependent phospholipase A2 activity	1/39	16/18410	0.0333748	0.184108	0.14717	PLA2G2A	1
MF	GO:0050135	NAD(P)+ nucleosidase activity	1/39	16/18410	0.0333748	0.184108	0.14717	IL1RL1	1
MF	GO:0061809	NAD+ nucleotidase, cyclic ADP-ribose generating	1/39	16/18410	0.0333748	0.184108	0.14717	IL1RL1	1
MF	GO:0002020	protease binding	2/39	136/18410	0.033593	0.184108	0.14717	ADAMTS4/SERPINE1	2
MF	GO:0020037	heme binding	2/39	139/18410	0.0349586	0.184108	0.14717	CYP4B1/HBB	2
MF	GO:0140375	immune receptor activity	2/39	148/18410	0.0391829	0.184108	0.14717	IL1RL1/FCER1G	2
MF	GO:0046906	tetrapyrrole binding	2/39	149/18410	0.0396638	0.184108	0.14717	CYP4B1/HBB	2
MF	GO:0005506	iron ion binding	2/39	151/18410	0.0406324	0.184108	0.14717	AOX1/CYP4B1	2
MF	GO:0001848	complement binding	1/39	20/18410	0.0415474	0.184108	0.14717	VSIG4	1
MF	GO:0004602	glutathione peroxidase activity	1/39	22/18410	0.0456084	0.184108	0.14717	MGST1	1
MF	GO:0005540	hyaluronic acid binding	1/39	24/18410	0.0496526	0.184108	0.14717	LYVE1	1
MF	GO:0019865	immunoglobulin binding	1/39	24/18410	0.0496526	0.184108	0.14717	FCER1G	1
MF	GO:0051537	2 iron, 2 sulfur cluster binding	1/39	24/18410	0.0496526	0.184108	0.14717	AOX1	1
